# Supplementary material for: Photocatalytic activity of micron-scale brass on emerging pollutant degradation in water: mechanism elucidation and removal efficacy assessment
Source: Royal Society of Chemistry journal article supplement (doi:10.1039/d0ra06153k), 2020-01-01
Supplement: d0ra06153k1.pdf [file d0ra06153k1.pdf]

**SUPPLEMENTARY MATERIAL**

**Photocatalytic Activity of Micron-scale Brass on Emerging Pollutant  
Degradation in Water: Mechanism Elucidation and Removal Efficacy  
Assessment**

Irwing M. Ramirez-Sanchez <sup>1</sup>, Onur G. Apul <sup>2</sup>, and Navid B. Saleh\* <sup>1</sup>

<sup>1</sup> Department of Civil, Architectural and Environmental Engineering, The University of Texas at  
Austin, Austin, TX, 78712, USA

<sup>2</sup> University of Maine, Orono, ME 04469, USA

Manuscript in Preparation for Submission

To

RSC Advances

\* Corresponding author: Navid B. Saleh, email: [navid.saleh@utexas.edu](mailto:navid.saleh@utexas.edu), phone: (512) 471-9175

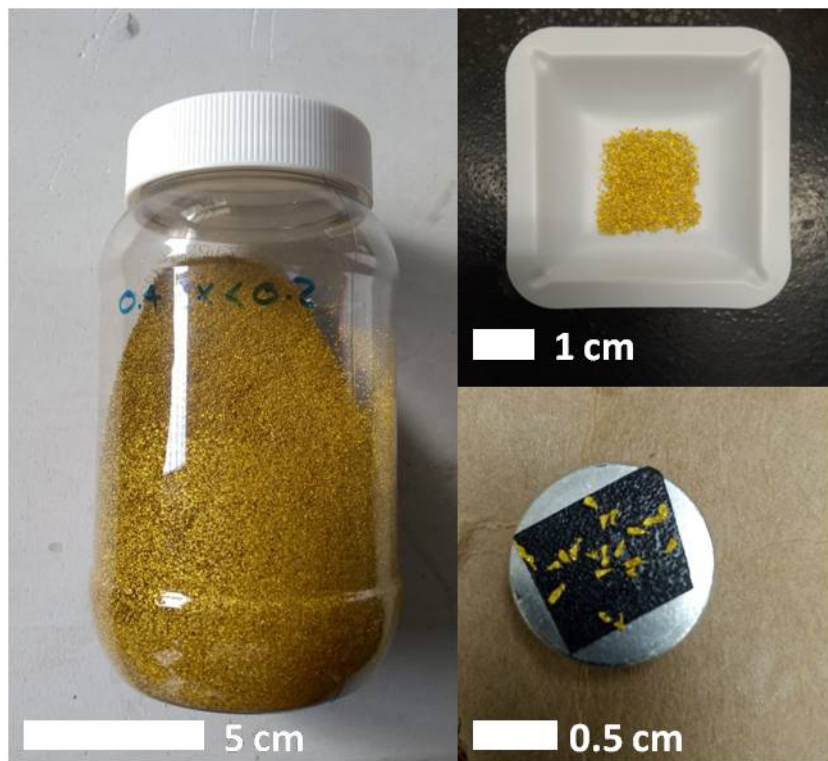

**Figure S1.** Photographs of KDF<sup>®</sup> 55 (MicroCuZn) as used in characterization and tets.

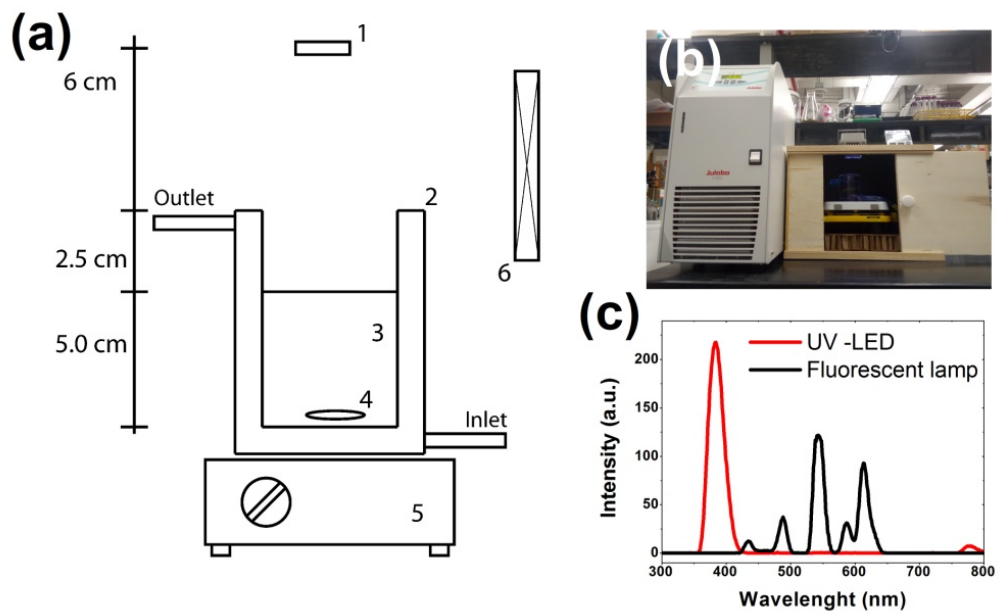

**Figure S2.** Batch experimental setup. (a) Scheme of photocatalytic reactor: 1. Light Emitting Diode (UV-LED), 2. water-cooled-jacketed glass reactor, 3. testing solution, 4. spin bar, 5. magnetic stirrer, and 6. fan; (b) photograph of the equipment used in the photocatalytic experiments; and (c) diffraction spectrum of lamp.

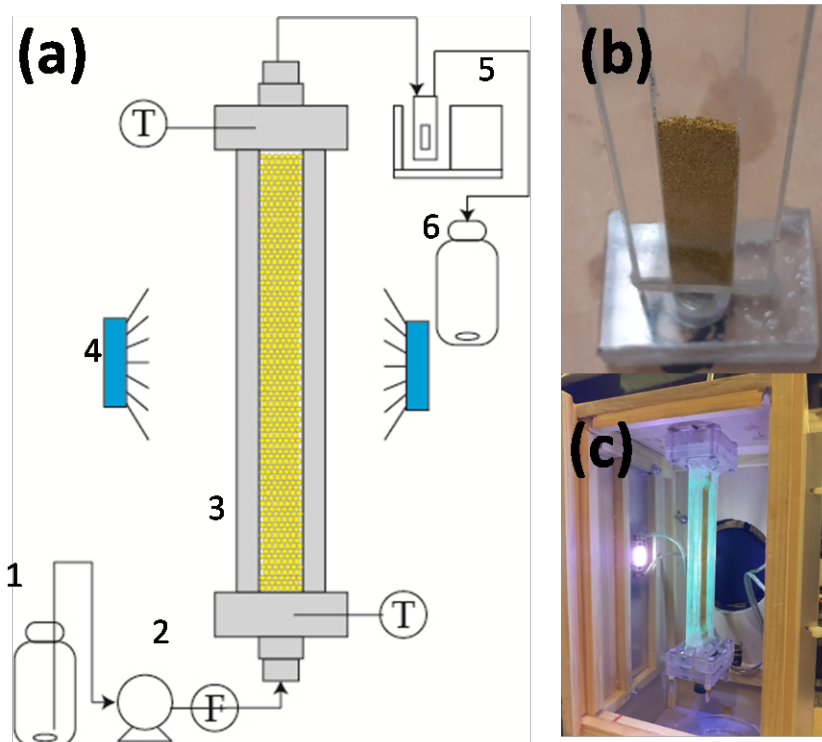

**Figure S3.** Continuous packed bed photocatalytic reactor. (a) Scheme of the continuous packed bed reactor (1) test solution, (2) peristaltic pump, (3) packed bed reactor, (4) LED light source, (5) continuous-flow quartz cuvette in UV-Vis spectrophotometer, and (6) treated solution; (b) photograph showing catalyst being packed, and (c) laboratory set up photograph.

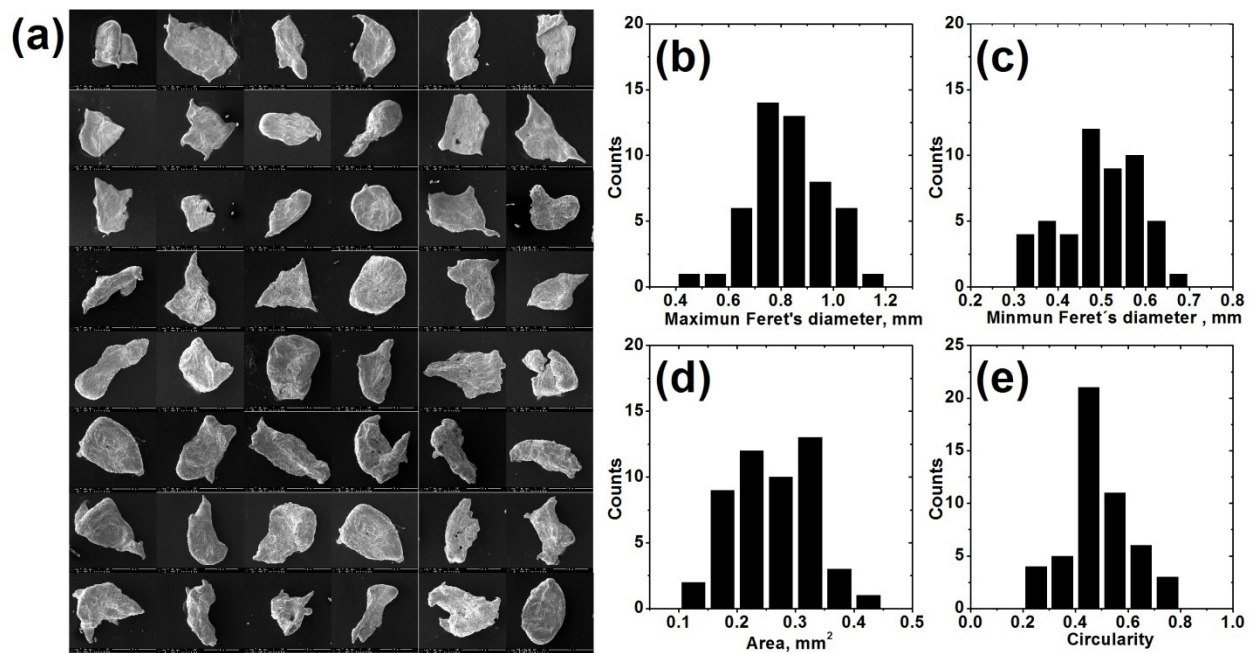

**Figure S4.** MicroCuZn size and shape characterization of (a) TEM micrographs using random sampling; (b and c) Ferret's diameter distributions; (d) projected area distribution; and (e) circularity distribution.

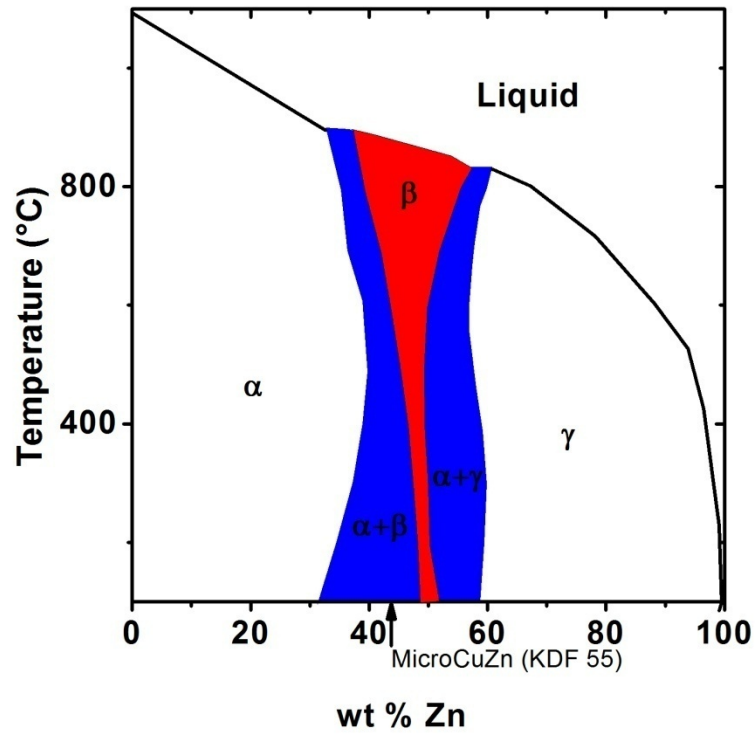

Figure S5. Brass phases modified as per Kaprara et al. <sup>12</sup>

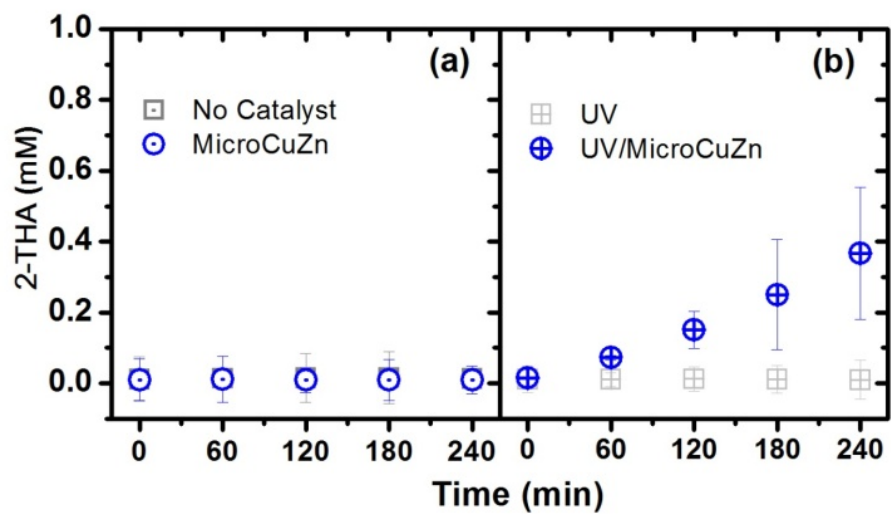

**Figure S6.**  $\cdot\text{OH}$  radicals production of MicroCuZn ( $10 \text{ g L}^{-1}$ ) with terephthalic acid (TA, 100 ml, 0.5 mM TA and 2mM NaOH, pH 9). (a) In dark, and (b) under UV irradiation ( $9.9 \mu\text{Einstein min}^{-1}$ ) at  $20 \text{ }^\circ\text{C}$ .

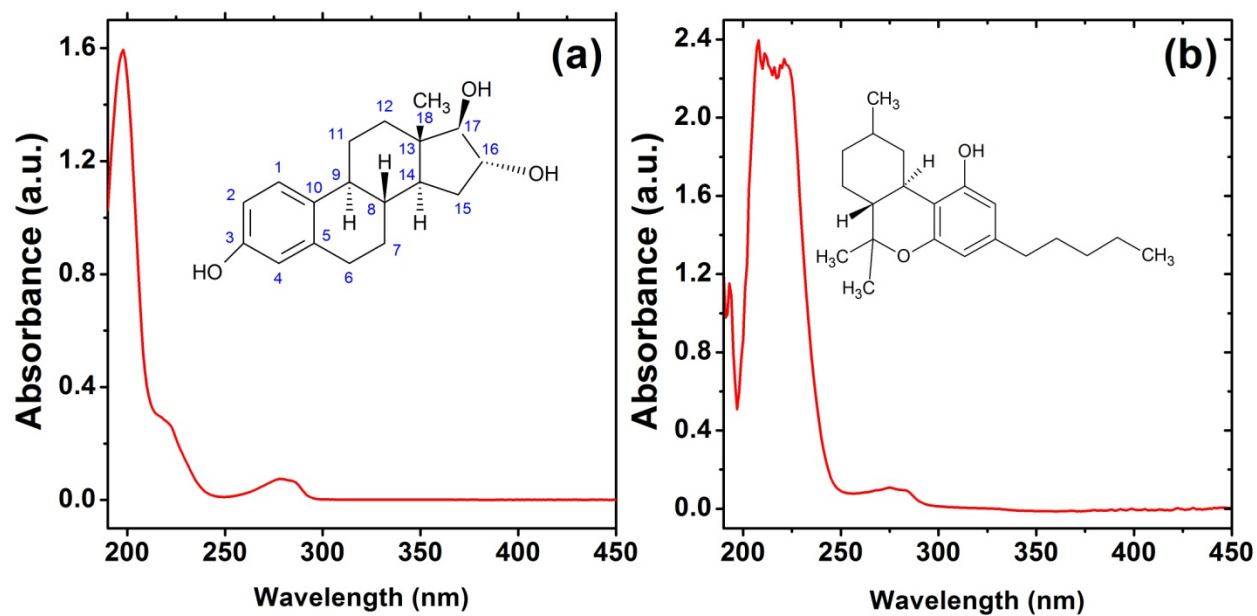

**Figure S7.** The UV-visible adsorption spectrum and molecule structure of (a) Estriol (E3) and (b)  $\Delta^9$ -tetrahydrocannabinol (THC)



**Table S1.** Elemental composition of MicroCuZn by energy dispersive X-Ray Spectroscopy

| <b>Element</b> | <b>[wt.%]</b> | <b>[norm. wt.%]</b> | <b>[norm. at.%]</b> |
|----------------|---------------|---------------------|---------------------|
| Copper         | 47.21         | 34.17               | 31.94               |
| Zinc           | 44.37         | 32.12               | 29.17               |
| Zirconium      | 11.6          | 8.4                 | 5.47                |
| Thallium       | 6.7           | 4.85                | 1.41                |
| Carbon         | 3.91          | 2.83                | 13.99               |
| Hafnium        | 3.81          | 2.76                | 0.92                |
| Platinum       | 3.43          | 2.48                | 0.76                |
| Gold           | 2.68          | 1.94                | 0.59                |
| Mercury        | 2.59          | 1.87                | 0.55                |
| Oxygen         | 1.52          | 1.1                 | 4.09                |
| Tungsten       | 1.44          | 1.04                | 0.34                |
| Sodium         | 1.32          | 0.96                | 2.47                |
| Aluminium      | 0.92          | 0.66                | 1.46                |
| Nickel         | 0.78          | 0.57                | 0.57                |
| Cobalt         | 0.48          | 0.35                | 0.35                |
| Nitrogen       | 0.44          | 0.32                | 1.35                |
| Iron           | 0.43          | 0.31                | 0.33                |
| Boron          | 0.42          | 0.3                 | 1.66                |
| Iodine         | 0.39          | 0.28                | 0.13                |
| Silver         | 0.36          | 0.26                | 0.14                |
| Manganese      | 0.3           | 0.22                | 0.23                |
| Fluorine       | 0.29          | 0.21                | 0.65                |
| Antimony       | 0.26          | 0.19                | 0.09                |
| Iridium        | 0.25          | 0.18                | 0.06                |
| Arsenic        | 0.25          | 0.18                | 0.14                |
| Ruthenium      | 0.25          | 0.18                | 0.11                |
| Palladium      | 0.24          | 0.17                | 0.1                 |
| Tin            | 0.19          | 0.14                | 0.07                |
| Chromium       | 0.14          | 0.1                 | 0.12                |
| Rhodium        | 0.14          | 0.1                 | 0.06                |
| Vanadium       | 0.14          | 0.1                 | 0.12                |
| Tellurium      | 0.13          | 0.1                 | 0.05                |
| Indium         | 0.13          | 0.1                 | 0.05                |
| Rhenium        | 0.11          | 0.08                | 0.03                |
| Magnesium      | 0.1           | 0.08                | 0.18                |
| Tantalum       | 0.1           | 0.07                | 0.02                |
| Cadmium        | 0.09          | 0.06                | 0.03                |
| Scandium       | 0.08          | 0.06                | 0.07                |
| Calcium        | 0.07          | 0.05                | 0.08                |
| Technetium     | 0.03          | 0.02                | 0.01                |
| Molybdenum     | 0.02          | 0.02                | 0.01                |
| Sulfur         | 0.02          | 0.02                | 0.03                |
| Potassium      | 0.02          | 0.01                | 0.02                |

**Table S2.** pH changes in pNDA bleaching experiments

| <b>System</b>                               | <b>Initial pH</b> | <b>Final pH</b> | <b><math>\Delta</math>pH</b> |
|---------------------------------------------|-------------------|-----------------|------------------------------|
| Dark/No catalyst                            | 7.07              | 7.02            | 0.05                         |
| Dark/MicroCuZn                              | 7.11              | 6.59            | 0.52                         |
| Dark/H <sub>2</sub> O <sub>2</sub>          | 7.01              | 6.83            | 0.18                         |
| H <sub>2</sub> O <sub>2</sub> /MicroCuZn    | 7.06              | 6.80            | 0.26                         |
| UV/No catalyst                              | 7.01              | 6.94            | 0.07                         |
| UV/MicroCuZn                                | 7.00              | 6.80            | 0.20                         |
| UV/H <sub>2</sub> O <sub>2</sub>            | 7.03              | 6.69            | 0.34                         |
| UV/H <sub>2</sub> O <sub>2</sub> /MicroCuZn | 7.01              | 6.72            | 0.29                         |
| <b>Mean</b>                                 | 7.04              | 6.80            | 0.24                         |
| <b>Min</b>                                  | 7.00              | 6.59            | 0.05                         |
| <b>Max</b>                                  | 7.11              | 7.02            | 0.52                         |
